# Supplementary material
Source: PubMed Central journal article supplement (PMC5357144)

**A**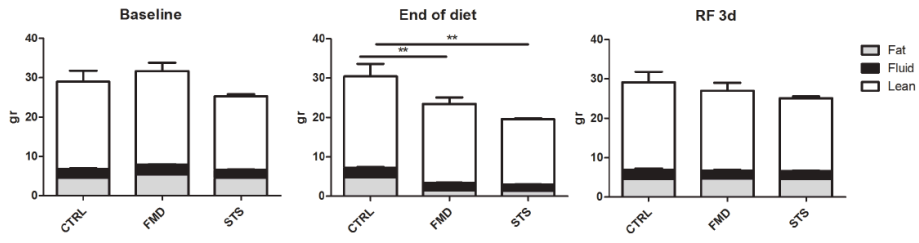**B**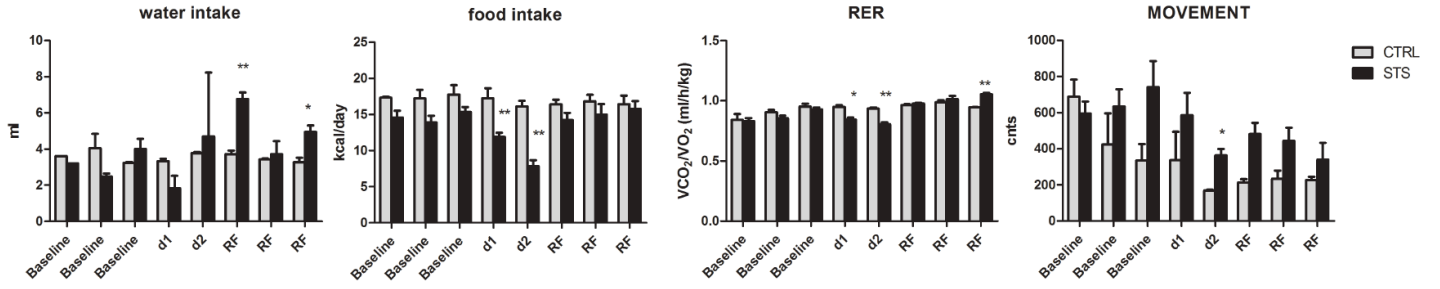**C**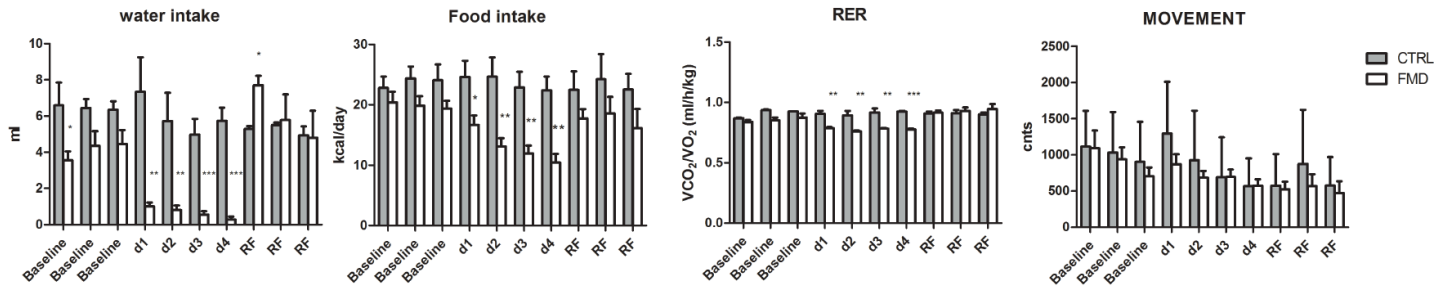**D**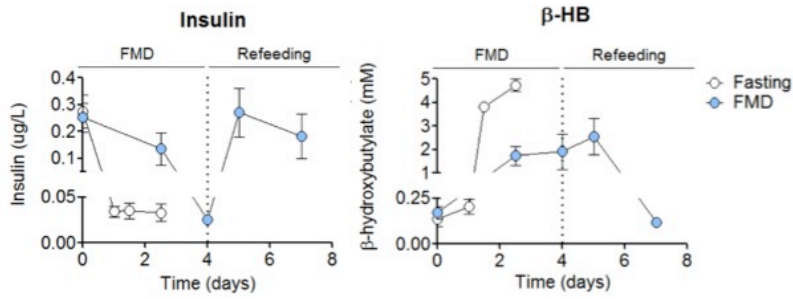

Supplement: NIHMS849263-supplement-1.pdf [file NIHMS849263-supplement-1.pdf]

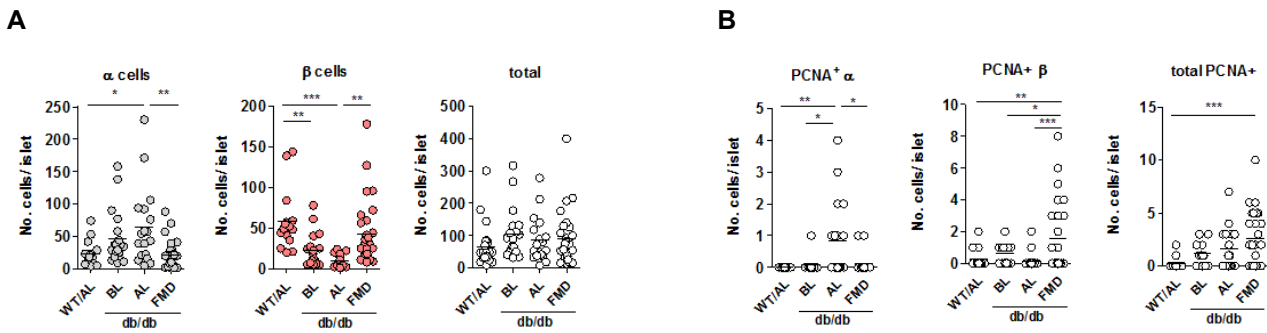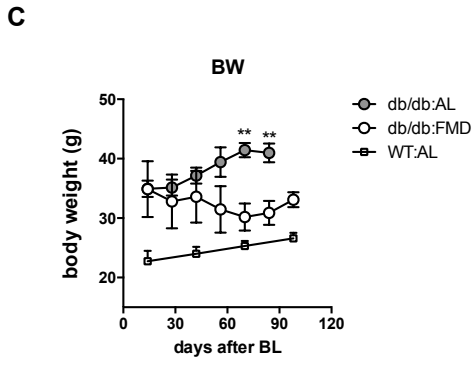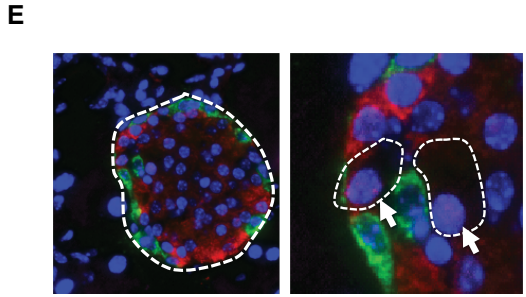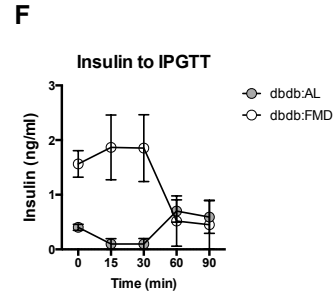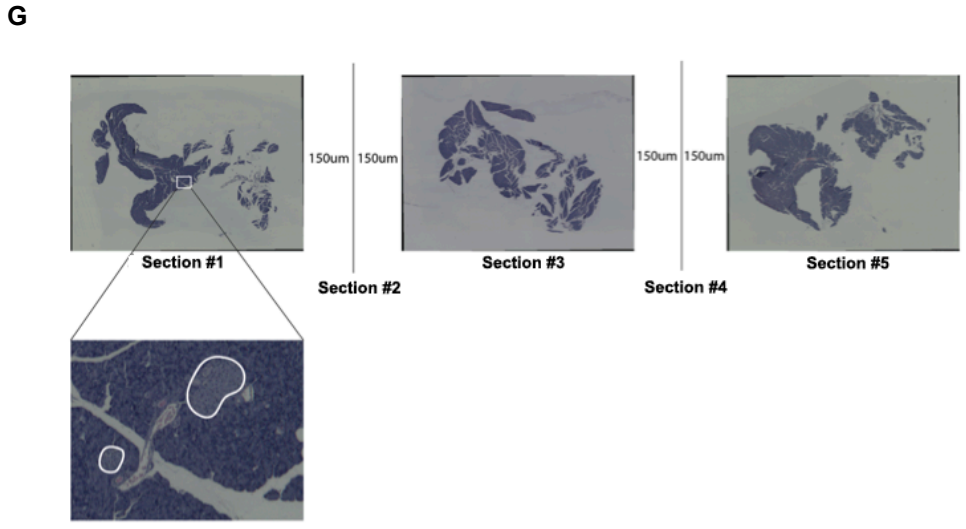

Supplement: NIHMS849263-supplement-2.pdf [file NIHMS849263-supplement-2.pdf]

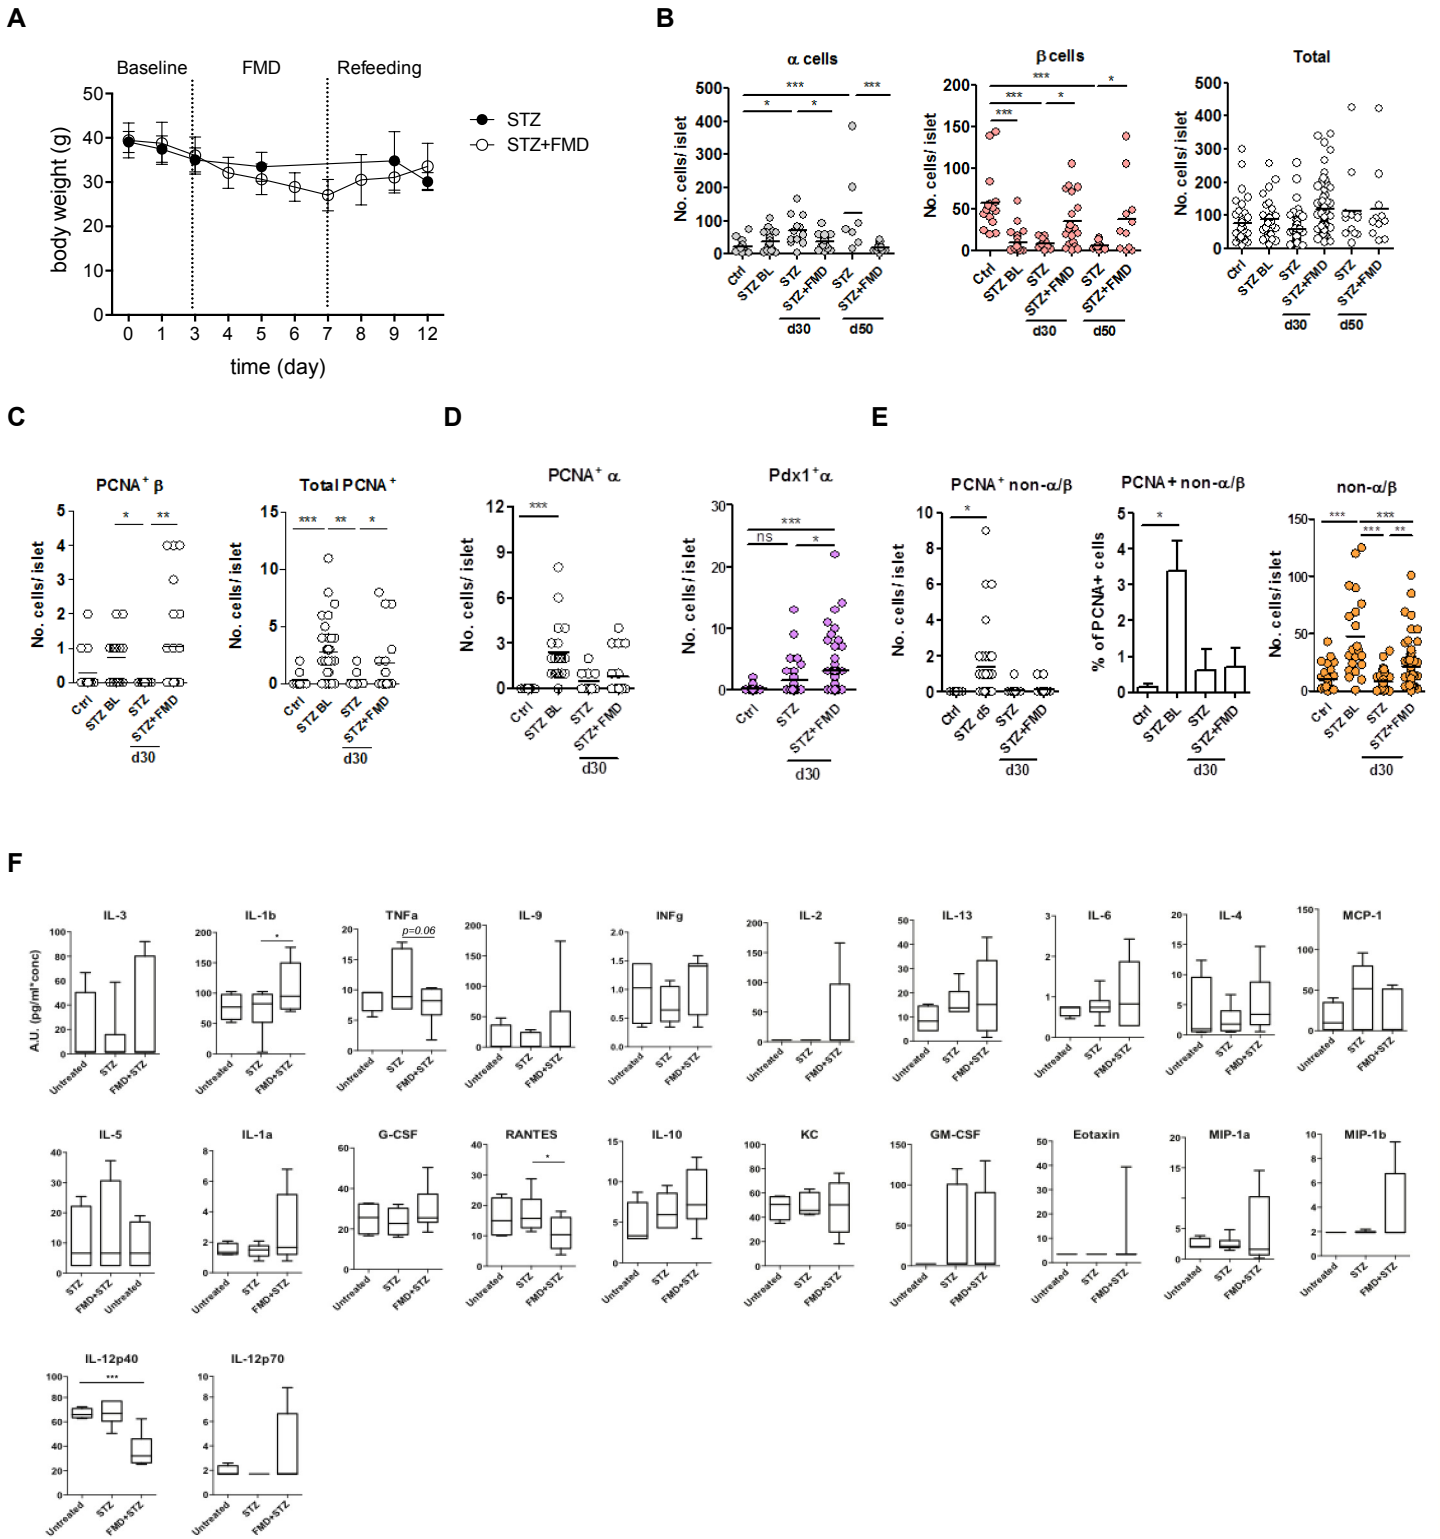

Supplement: NIHMS849263-supplement-3.pdf [file NIHMS849263-supplement-3.pdf]

**A**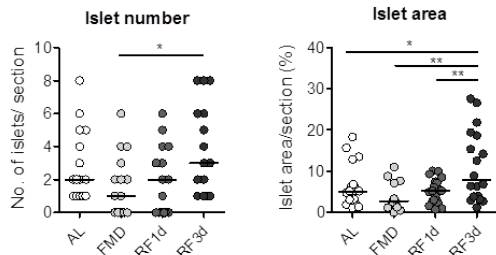**B**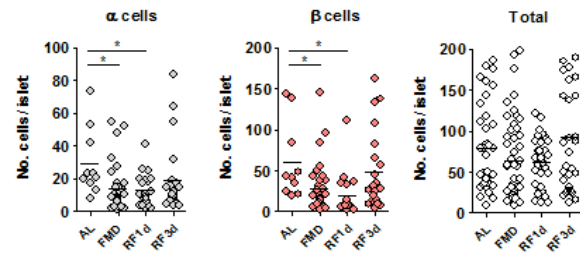**C**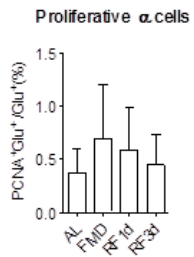**D**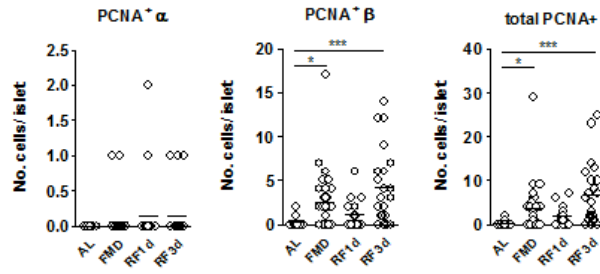**E**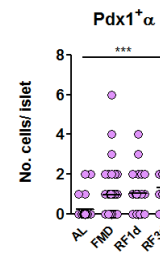**F**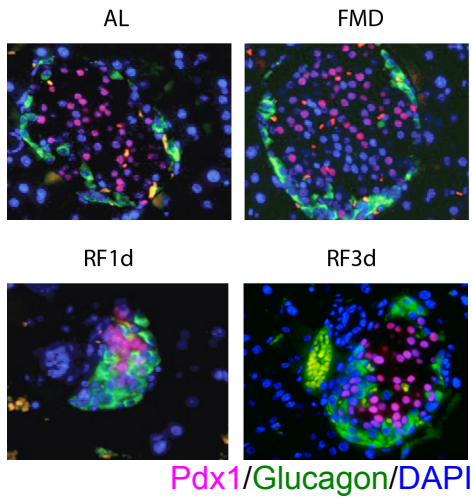**G**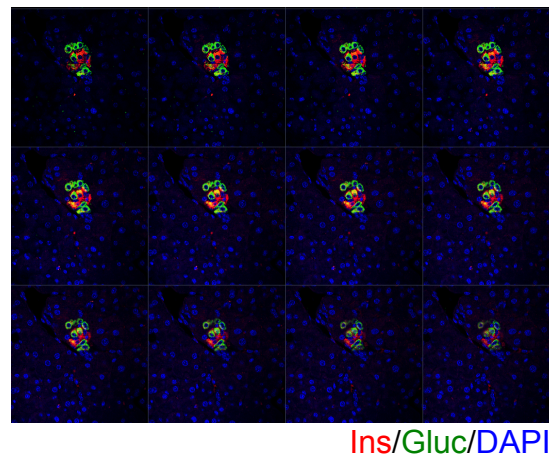**H**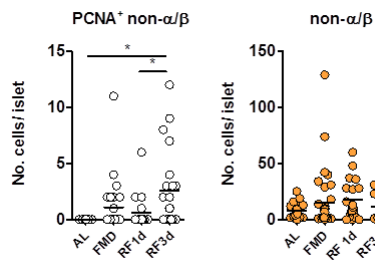

Supplement: NIHMS849263-supplement-4.pdf [file NIHMS849263-supplement-4.pdf]

**A**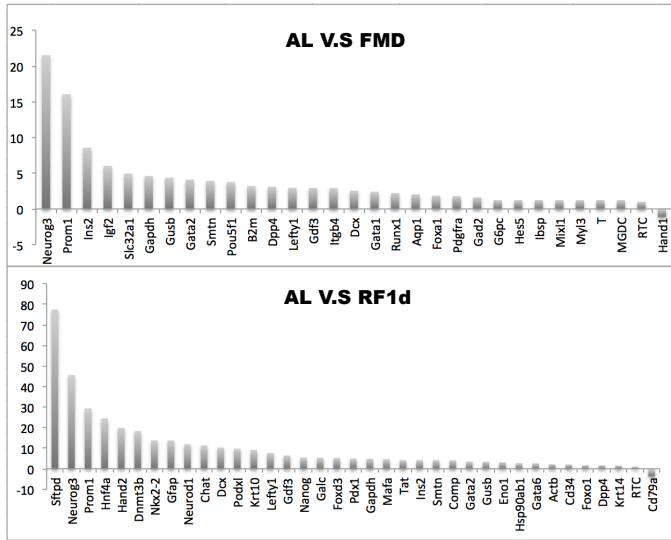**B**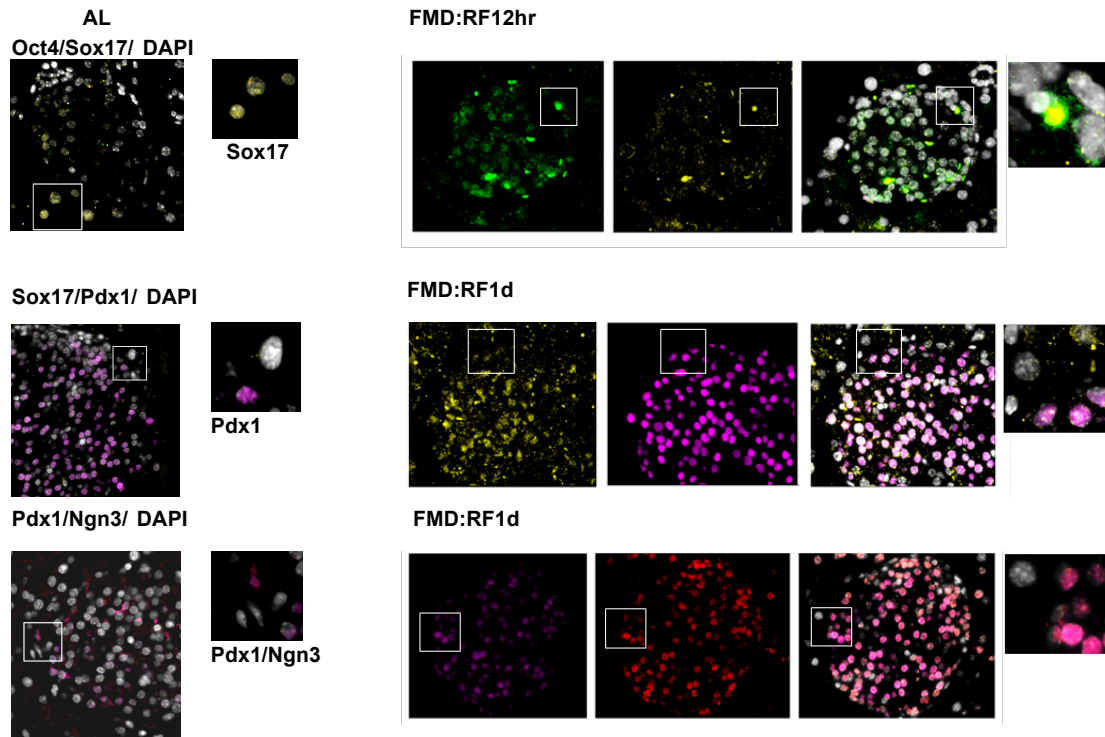**C**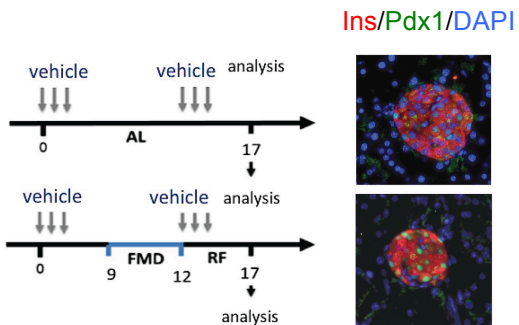

Supplement: NIHMS849263-supplement-5.pdf [file NIHMS849263-supplement-5.pdf]

**A**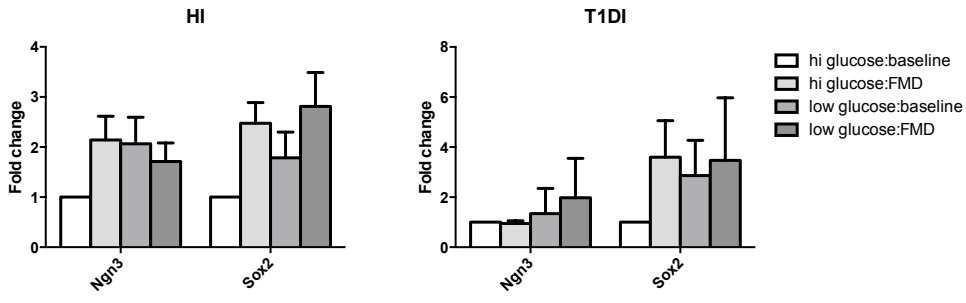**B**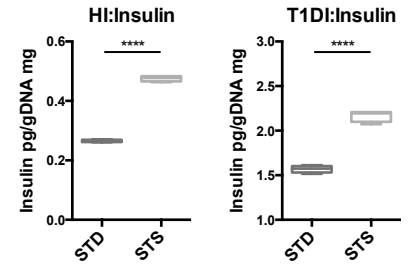

Supplement: NIHMS849263-supplement-6.pdf [file NIHMS849263-supplement-6.pdf]
